# Supplementary material
Source: HighWire-hosted journal article supplement (https://www.genetics.org/content/suppl/2009/10/12/genetics.109.106922)
Supplement: TableS3.pdf [file TableS3.pdf]

**TABLE S3**  
**BLASTP results for genes predicted on BAC c0286M05 and c0171E08**

| BAC      | Predicted gene | First Hit Accession | Annotation (species)                                                         | E. value  | Comment                                                                                   |
|----------|----------------|---------------------|------------------------------------------------------------------------------|-----------|-------------------------------------------------------------------------------------------|
| c0286M05 | 1*             | EEH41564            | hypothetical protein ( <i>Paracoccidioides brasiliensis</i> )                | 0.94      |                                                                                           |
| c0286M05 | 2*             | XP_002446018        | hypothetical protein ( <i>Sorghum bicolor</i> )                              | 3.00E-74  | Third hit = ACA14488,<br>GHD7 ( <i>Oryza sativa</i> , Evalue=3e-30)                       |
| c0286M05 | 3              | AF391808_7          | RIRE2 orf3 ( <i>Zea mays</i> )                                               | 6.00E-92  |                                                                                           |
| c0286M05 | 4              | ABQ44355            | polyprotein ( <i>Zea mays</i> )                                              | 0         |                                                                                           |
| c0286M05 | 5              | AAN40028            | putative RIRE2 orf3 ( <i>Zea mays</i> )                                      | 2.00E-11  |                                                                                           |
| c0171E08 | 1              | ABQ44355            | polyprotein ( <i>Zea Mays</i> )                                              | 6.00E-51  |                                                                                           |
| c0171E08 | 2*             | YP_379909           | putative ATPase involved in DNA repair ( <i>Chlorobium chlorochromatii</i> ) | 5.6       |                                                                                           |
| c0171E08 | 3*             | XP_002453913        | hypothetical protein ( <i>Sorghum bicolor</i> )                              | 8.00E-56  |                                                                                           |
| c0171E08 | 4*             | ACN36685            | unknown ( <i>Zea mays</i> )                                                  | 3.00E-53  |                                                                                           |
| c0171E08 | 5              | ACN34364            | unknown ( <i>Zea mays</i> )                                                  | 4.00E-109 | TE-related                                                                                |
| c0171E08 | 6*             | NP_001142422        | hypothetical protein ( <i>Zea mays</i> )                                     | 0.008     |                                                                                           |
| c0171E08 | 7*             | XP_002447409        | hypothetical protein ( <i>Sorghum bicolor</i> )                              | 8.00E-34  | Other hits indicate similarity with<br>Plant invertase/pectin methylesterase<br>inhibitor |
| c0171E08 | 8              | ABF67936            | Milt putative polyprotein ( <i>Zea mays</i> )                                | 1.00E-08  |                                                                                           |

\* These genes are reported in Figure 3 :

c0286M05#1 = No Sign. Hit 1

c0171E08#2 = No Sign. Hit 2

c0171E08#6 = Hyp.3

c0286M05#2 =  $\tilde{m}CCT$

c0171E08#3 = Hyp. 1

c0171E08#7 = PME1

c0171E08#4 = Hyp. 2
